# Supplementary material for: A novel sensitive and selective chemosensor for fluorescent detection of Zn2+ in cosmetics creams based on a covalent post functionalized Al-MOF
Source: Royal Society of Chemistry journal article supplement (doi:10.1039/d1nj00871d), 2021-01-01
Supplement: d1nj00871d1.pdf [file d1nj00871d1.pdf]

## A novel sensitive and selective chemosensor for fluorescent detection of Zn<sup>2+</sup> in cosmetics creams based on covalent post functionalized Al-MOF

Rasha M. Kamel <sup>a,\*</sup>, Ahmed Shahat <sup>a,b,\*</sup>, Zeinab M. Anwar <sup>c</sup>, Hamdy A. El-Kady <sup>d</sup>, Esraa M. Kilany <sup>d</sup>

<sup>a</sup> Suez University, Faculty of Science, Chemistry Department, 43518 Suez, Egypt

<sup>b</sup> Chemistry Department, College of Science and Art, King Abdulaziz University, Rabigh 21911, Saudi Arabia

<sup>c</sup> Suez Canal University, Faculty of Science, Chemistry Department, 41522 Ismailia, Egypt.

<sup>d</sup> Suez University, Faculty of Petroleum and Mining Engineering, Science and Mathematics Department, Suez, Egypt

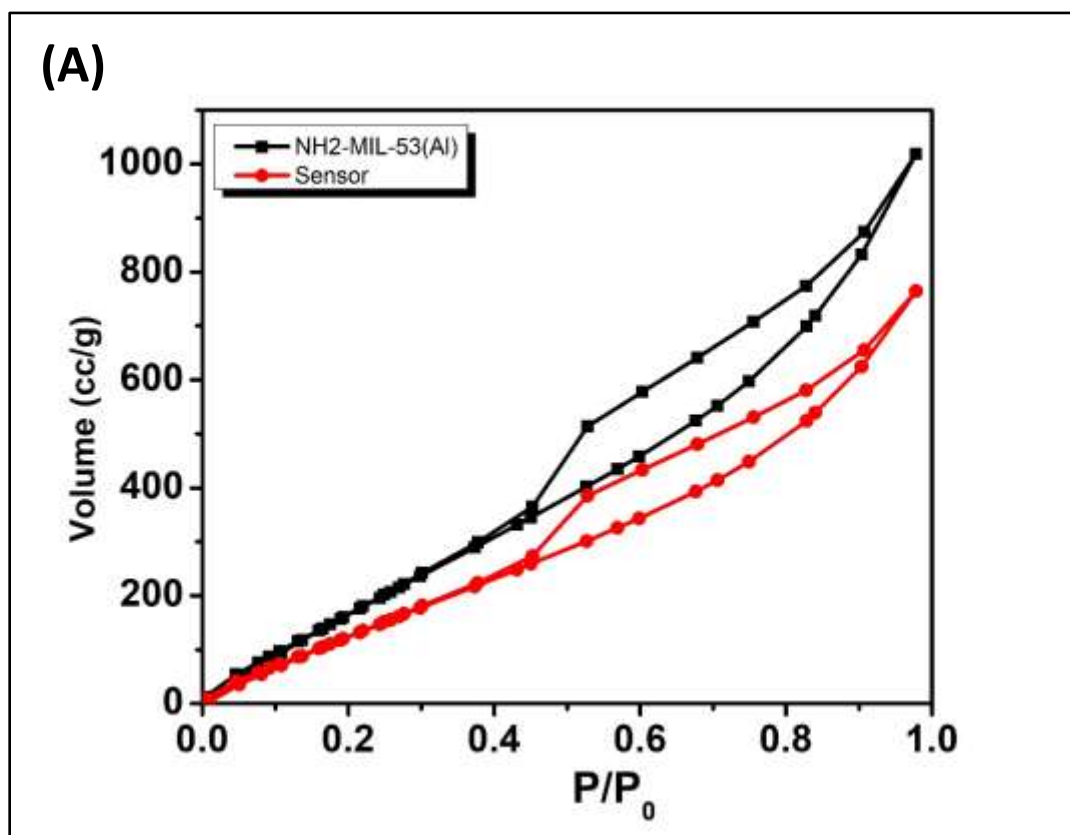

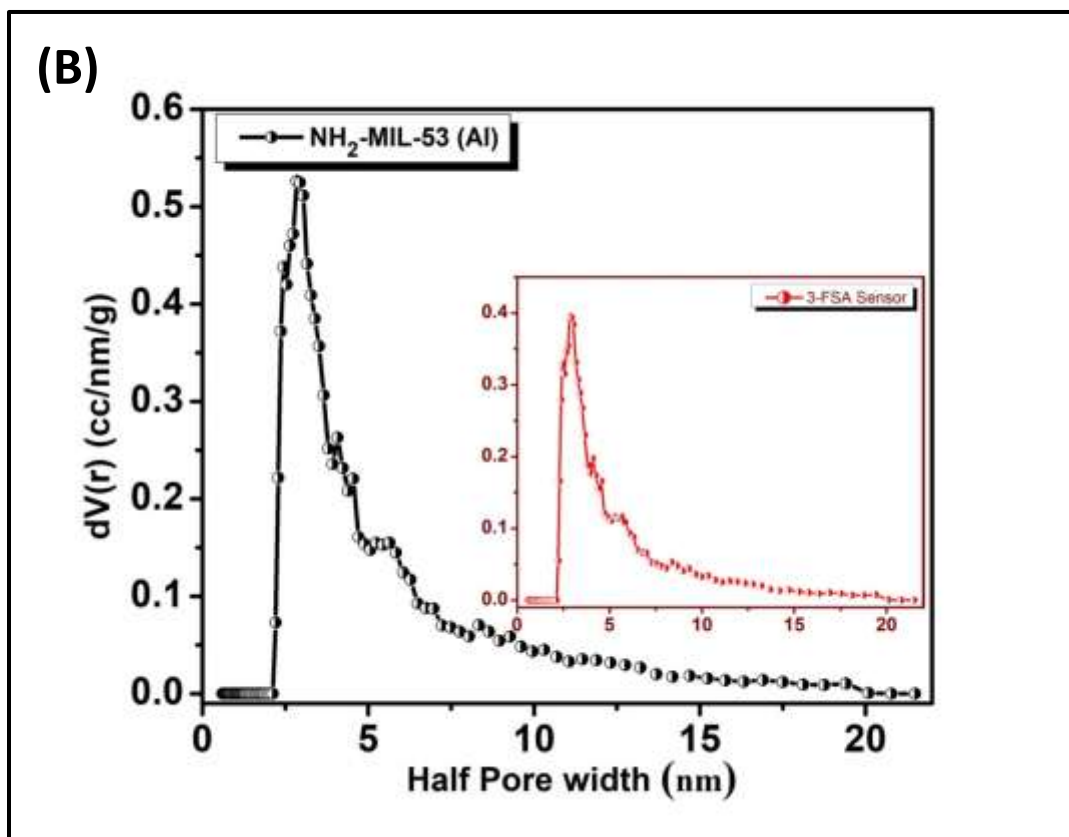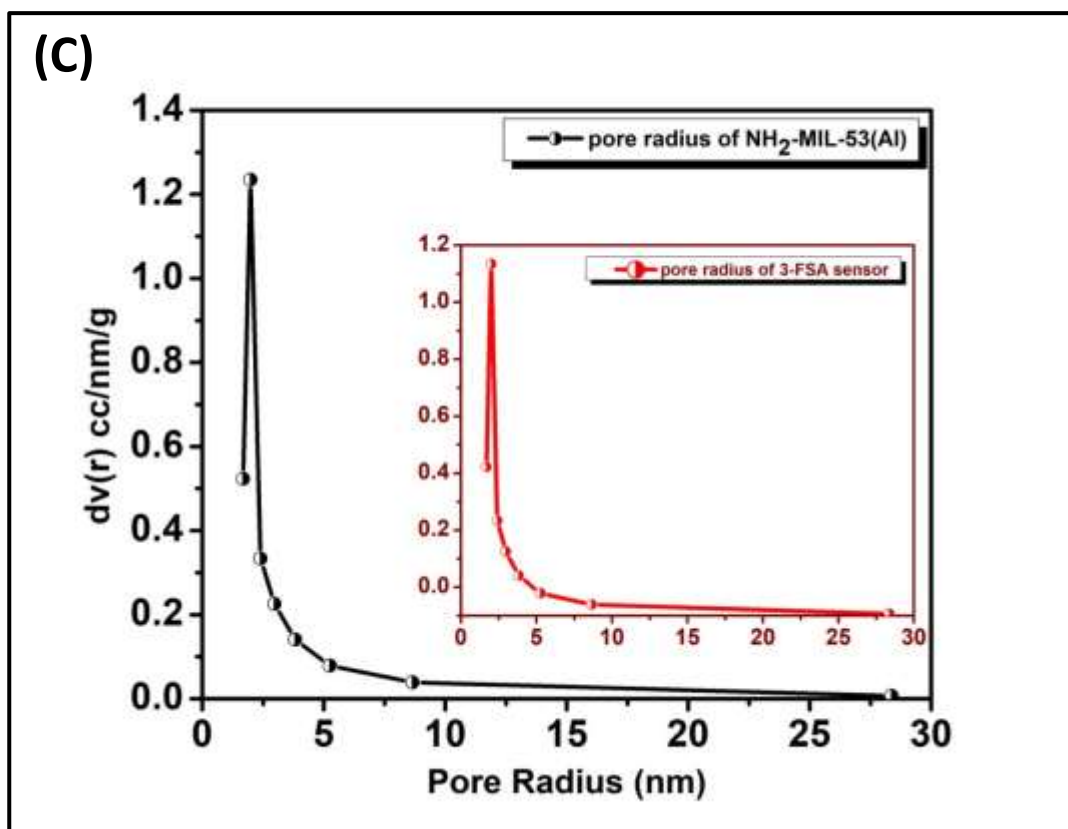

**Fig. S1** Nitrogen adsorption isotherms (A) pore size distribution with DFT method (B) and with BJH desorption method (C) of  $\text{NH}_2\text{-MIL-53(Al)}$  and 3-FSA sensor.

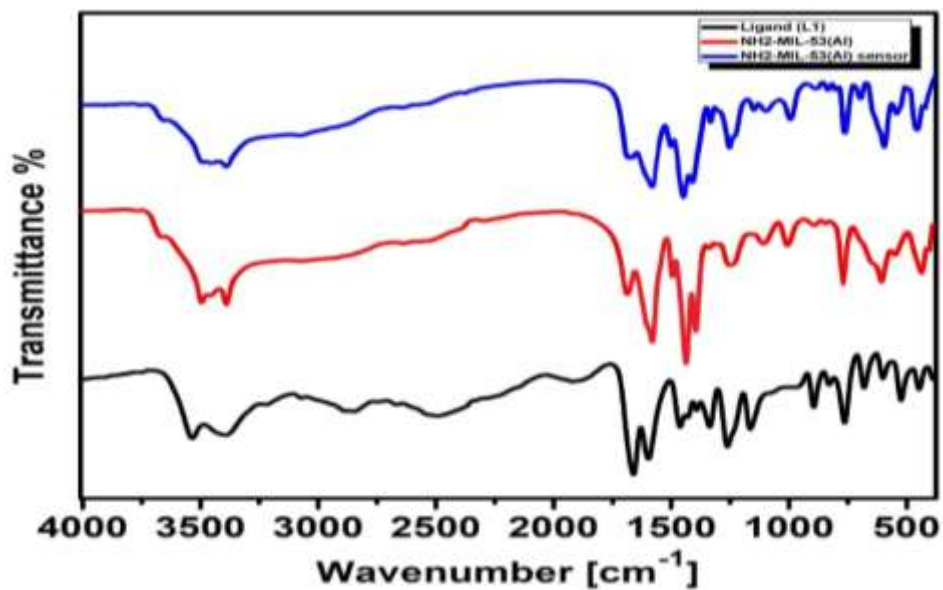

**Fig. S2:** FT-IR spectra of the NH<sub>2</sub>-MIL-53(Al), 3-FSA and 3-FSA sensor.

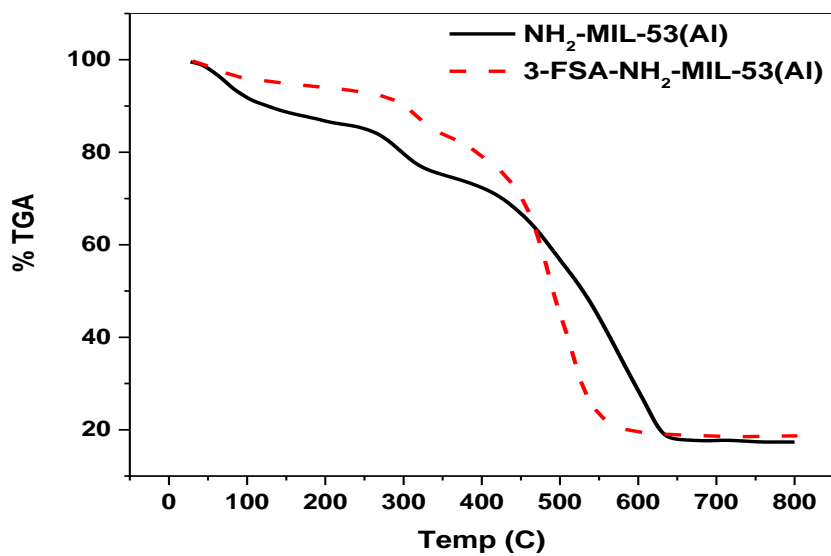

**Fig. S3:** TGA curve of the NH<sub>2</sub>-MIL-53(Al) and 3-FSA and 3-FSA sensor.

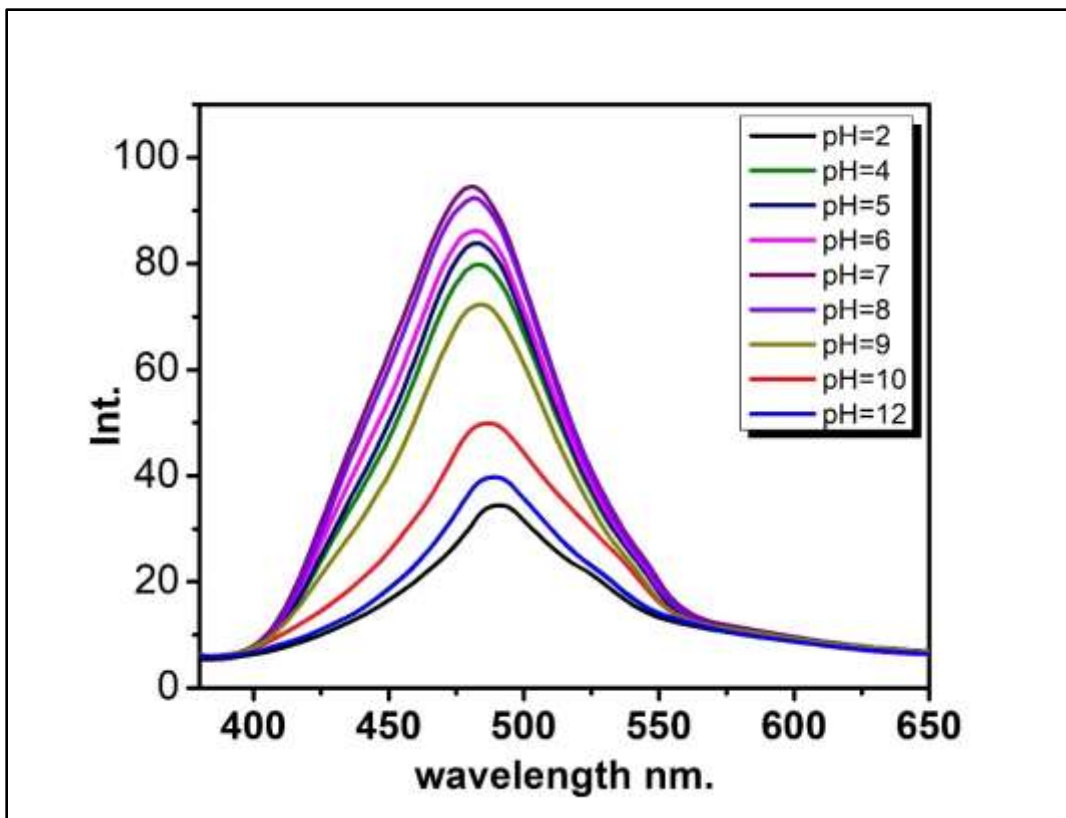

**Fig. S4.** Emission spectrum for the 3-FSA sensor with different pH at  $\lambda_{\text{ex}}=380$  nm.

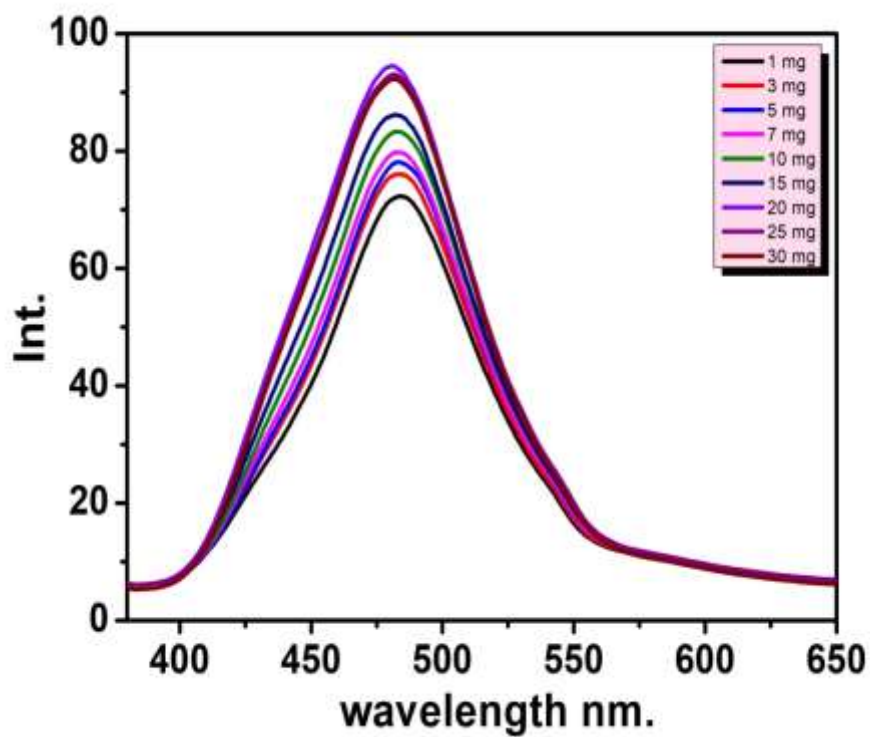

**Fig. S5:** Influence of 3-FSA sensor amount on the emission intensity of the sensor.

**Table S1:** List of some cosmetic creams commonly used in Egypt.

| S/N | Sample code | Name of creams       | Name of manufacturer                         | Quantity in pack | Zn (g) in (1 gram) |
|-----|-------------|----------------------|----------------------------------------------|------------------|--------------------|
| 01  | 01CC        | Hipanthen plus cream | Pixel Pharmaceuticals & Cosmetics, Egypt     | 60 gm            | 0.016              |
| 02  | 02CC        | Procto- lidocine     | Amriya Pharm.IND, Egypt                      | 20 gm            | 0.0289             |
| 03  | 03CC        | Lidocaine ointment   | Zuche Pharmaceuticals Private Limited, India | 15 gm            | 0.04               |
| 04  | 04CC        | Zincosil             | Misr comp. for Pharmaceuticals, Egypt        | 20 gm            | 0.06               |
| 05  | 05CC        | Zira gel             | BORG Pharmaceuticals IND, Egypt              | 20 gm            | 0.000356           |
| 06  | 06CC        | Insect Bite gel      | Pharaonia Pharmaceuticals, Egypt             | 20 gm            | 0.00356            |
